# Supplementary material for: Quality of Visual Cue Affects Visual Reweighting in Quiet Standing
Source: PLoS One. 2016 Mar 3;11(3):e0150158. doi: 10.1371/journal.pone.0150158 (PMC4777428; doi:10.1371/journal.pone.0150158)
Supplement: S1 Supporting Information — Spreadsheet named "Gain & Phase" contains means and standard errors from the statistical analyses involving visual transitions. Spreadsheet named "Phase Variability" contains means and standard errors from the statistical analyses involving phase variability. (XLSX) [file pone.0150158.s001.xlsx]

## Sheet: Gain & Phase
NV and BV Transitions
Measure	Condition	Cycles	Mean	Std. Error	95% Confidence Interval			NV: no vision
					Lower Bound	Upper Bound		BV: binocular vision
GAIN	NV > BV	B-2	0.507	0.108	0.266	0.748
		B-1	0.517	0.084	0.33	0.703
		B0	0.494	0.098	0.277	0.711
		T	1.197	0.116	0.938	1.455
		A+1	1.462	0.24	0.928	1.997
		A+2	1.355	0.147	1.027	1.683
	BV > NV	B-2	1.239	0.197	0.8	1.678
		B-1	1.002	0.127	0.718	1.286
		B0	1.024	0.129	0.736	1.313
		T	0.569	0.119	0.303	0.834
		A+1	0.544	0.078	0.37	0.718
		A+2	0.481	0.097	0.265	0.696
PHASE (°)	NV > BV	B-2	15.322	23.131	-36.217	66.861
		B-1	1.864	23.711	-50.968	54.696
		B0	-4.659	24.099	-58.354	49.037
		T	5.417	3.321	-1.981	12.816
		A+1	-10.834	3.626	-18.913	-2.756
		A+2	-7.438	3.265	-14.712	-0.164
	BV > NV	B-2	-6.187	5.438	-18.303	5.929
		B-1	-7.495	5.691	-20.174	5.185
		B0	-5.429	4.703	-15.908	5.05
		T	10.946	18.292	-29.812	51.704
		A+1	0.459	26.797	-59.249	60.167
		A+2	-9.962	14.742	-42.809	22.885
NV and MV Transitions								NV: no vision
Measure	Condition	Cycles	Mean	Std. Error	95% Confidence Interval			MV: monocular vision
					Lower Bound	Upper Bound
GAIN	NV > MV	B-2	0.505	0.09	0.304	0.706
		B-1	0.462	0.052	0.347	0.577
		B0	0.444	0.069	0.29	0.597
		T	0.937	0.151	0.601	1.273
		A+1	0.908	0.131	0.617	1.2
		A+2	0.994	0.151	0.657	1.33
	MV > NV	B-2	0.942	0.209	0.477	1.407
		B-1	0.729	0.092	0.524	0.933
		B0	0.699	0.104	0.467	0.93
		T	0.789	0.129	0.501	1.076
		A+1	0.464	0.056	0.339	0.588
		A+2	0.517	0.071	0.359	0.674
PHASE (°)	NV > MV	B-2	-18.255	19.811	-62.396	25.886
		B-1	9.747	15.046	-23.778	43.271
		B0	-19.003	15.27	-53.027	15.021
		T	5.208	10.11	-17.319	27.736
		A+1	-15.514	4.927	-26.492	-4.536
		A+2	-3.766	8.646	-23.031	15.499
	MV > NV	B-2	-13.642	6.549	-28.234	0.951
		B-1	-2.085	11.199	-27.039	22.868
		B0	-3.435	10.545	-26.931	20.06
		T	-6.507	24.913	-62.015	49.002
		A+1	0.404	14.108	-31.031	31.838
		A+2	-54.996	22.934	-106.095	-3.896
BV and MV Transitions								MV: monocular vision
Measure	Condition	Cycles	Mean	Std. Error	95% Confidence Interval			BV: binocular vision
					Lower Bound	Upper Bound
GAIN	MV > BV	B-2	0.749	0.11	0.502	0.995
		B-1	0.709	0.127	0.427	0.992
		B0	0.736	0.124	0.46	1.013
		T	1.227	0.182	0.82	1.633
		A+1	1.171	0.092	0.966	1.376
		A+2	0.978	0.157	0.628	1.328
	BV > MV	B-2	1.02	0.166	0.65	1.391
		B-1	1.064	0.118	0.8	1.328
		B0	1.117	0.15	0.783	1.452
		T	0.741	0.12	0.473	1.009
		A+1	0.821	0.109	0.579	1.063
		A+2	0.78	0.105	0.546	1.015
PHASE (°)	MV > BV	B-2	-17.436	7.963	-35.178	0.307
		B-1	-6.615	8.175	-24.83	11.601
		B0	-5.792	8.119	-23.882	12.297
		T	-10.06	8.139	-28.194	8.074
		A+1	-7.144	4.477	-17.119	2.832
		A+2	-11.37	4.164	-20.648	-2.092
	BV > MV	B-2	-5.971	5	-17.111	5.169
		B-1	2.973	7.149	-12.957	18.903
		B0	-5.036	3.849	-13.611	3.539
		T	-20.687	10.168	-43.343	1.969
		A+1	-4.69	4.829	-15.449	6.07
		A+2	-8.135	7.262	-24.316	8.045

## Sheet: Phase Variability
NV and BV Transitions
Condition	Intervals	Mean	Std. Error	95% Confidence Interval			NV: no vision
				Lower Bound	Upper Bound		MV: monocular vision
NV > BV	Before	96.798	2.175	91.951	101.645		BV: binocular vision
	After	16.674	1.669	12.955	20.392
BV > NV	Before	20.829	2.892	14.385	27.273
	After	95.768	2.761	89.618	101.919
NV and MV Transitions
Condition	Intervals	Mean	Std. Error	95% Confidence Interval
				Lower Bound	Upper Bound
NV > MV	Before	96.52	3.972	87.67	105.371
	After	34.859	4.129	25.658	44.06
MV > NV	Before	36.37	3.948	27.574	45.166
	After	100.319	3.339	92.878	107.759
BV and MV Transitions
Condition	Intervals	Mean	Std. Error	95% Confidence Interval
				Lower Bound	Upper Bound
BV > MV	Before	18.931	1.975	14.53	23.332
	After	34.574	5.494	22.334	46.815
MV > BV	Before	34.203	4.14	24.978	43.427
	After	25.827	4.122	16.642	35.012
